# Supplementary material
Source: PubMed Central journal article supplement (PMC7483397)

**A**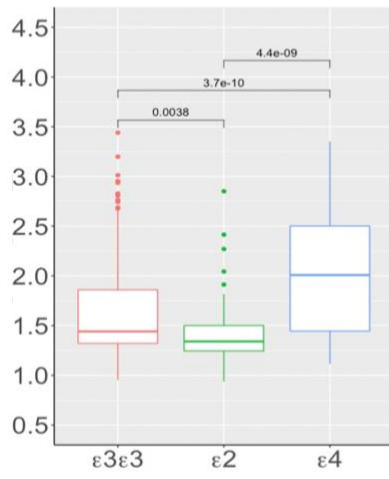**B**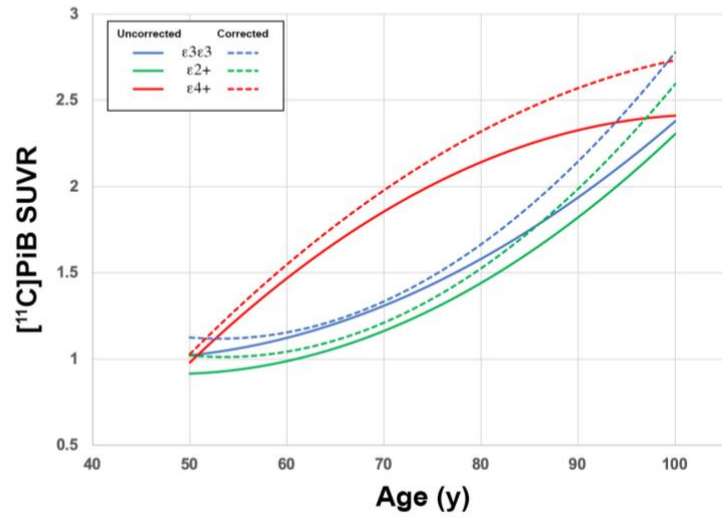

Supplement: NIHMS1609148-supplement-1.pdf [file NIHMS1609148-supplement-1.pdf]
